# Supplementary material for: Large palindromes on the primate X Chromosome are preserved by natural selection
Source: HighWire-hosted journal article supplement (doi:10.1101/gr.275188.120), 2021-07-21
Supplement: Supplemental_Table_S1.xlsx [file Supplemental_Table_S1.xlsx]

## Sheet: Supplemental_Table_S1.csv
Supplemental Table S1: Coordinates of human X palindromes in hg38. Palindromes were identified using a k-mer-based method (see Methods).
Palindrome	Arm 1 coordinates	Spacer coordinates	Arm 2 coordinates
P1	chrX: 48367308 - 48396305	chrX: 48396306 - 48399118	chrX: 48399119 - 48428123
P2	chrX: 51668115 - 51692963	chrX: 51692964 - 51700361	chrX: 51700362 - 51725226
P3	chrX: 52040713 - 52077110	chrX: 52077111 - 52176982	chrX: 52176983 - 52213380
P4	chrX: 52473449 - 52502219	chrX: 52502220 - 52510667	chrX: 52510668 - 52539437
P5	chrX: 52670289 - 52728969	chrX: 52728970 - 52729454	chrX: 52729455 - 52788214
P6	chrX: 52882200 - 52920138	chrX: 52920139 - 52935673	chrX: 52935674 - 52973611
P7	chrX: 55453561 - 55480141	chrX: 55480142 - 55493061	chrX: 55493062 - 55519639
P8	chrX: 71683199 - 71740534	chrX: 71740535 - 71741054	chrX: 71741055 - 71798363
P9	chrX: 72741066 - 72860190	chrX: 72860191 - 72860605	chrX: 72860606 - 72979767
P10	chrX: 72996086 - 73005278	chrX: 73005279 - 73077748	chrX: 73077749 - 73086935
P11	chrX: 102197589 - 102338170	chrX: 102338171 - 102348932	chrX: 102348933 - 102489526
P12	chrX: 103955950 - 103987907	chrX: 103987908 - 104050879	chrX: 104050880 - 104082911
P13	chrX: 120038201 - 120086776	chrX: 120086777 - 120149524	chrX: 120149525 - 120198163
P14	chrX: 135116122 - 135158129	chrX: 135158130 - 135214412	chrX: 135214413 - 135256414
P15	chrX: 135723708 - 135734732	chrX: 135734733 - 135748584	chrX: 135748585 - 135759685
P16	chrX: 141005250 - 141114518	chrX: 141114519 - 141472891	chrX: 141472892 - 141582141
P17	chrX: 146801856 - 146812219	chrX: 146812220 - 146812295	chrX: 146812296 - 146822659
P18	chrX: 149542167 - 149562176	chrX: 149562177 - 149917319	chrX: 149917320 - 149937339
P19	chrX: 149573130 - 149602230	chrX: 149602231 - 149767142	chrX: 149767143 - 149796257
P20	chrX: 149654519 - 149681126	chrX: 149681127 - 149722142	chrX: 149722143 - 149748749
P21	chrX: 152678580 - 152725390	chrX: 152725391 - 152743079	chrX: 152743080 - 152789894
P22	chrX: 153066010 - 153074417	chrX: 153074418 - 153075611	chrX: 153075612 - 153084043
P23	chrX: 153106025 - 153149489	chrX: 153149490 - 153250484	chrX: 153250485 - 153293919
P24	chrX: 154337197 - 154347246	chrX: 154347247 - 154384865	chrX: 154384866 - 154394951
P25	chrX: 154555880 - 154591327	chrX: 154591328 - 154613094	chrX: 154613095 - 154648556
P26	chrX: 155336691 - 155386727	chrX: 155386728 - 155453980	chrX: 155453981 - 155504550
