# Supplementary material for: Large palindromes on the primate X Chromosome are preserved by natural selection
Source: HighWire-hosted journal article supplement (doi:10.1101/gr.275188.120), 2021-07-21
Supplement: Supplemental_Table_S2.xlsx [file Supplemental_Table_S2.xlsx]

## Sheet: Supplemental_Table_S2.csv
Supplemental Table S2: Human X-palindrome genes and gene families
Gene	Ensembl Gene ID (GENCODE v34)	Multi-copy gene family	Palindrome	Notes
SSX4	ENSG00000268009	SSX4	P1
SSX4B	ENSG00000269791	SSX4	P1
CENPVL2	ENSG00000283093	CENPVL	P2
CENPVL1	ENSG00000223591	CENPVL	P2
MAGED4B	ENSG00000187243	MAGED4	P3
MAGED4	ENSG00000154545	MAGED4	P3
XAGE1A	ENSG00000204379	XAGE1	P4
XAGE1B	ENSG00000204382	XAGE1	P4
SSX2	ENSG00000241476	SSX2	P5
SSX2B	ENSG00000268447	SSX2	P5
FAM156B	ENSG00000179304	FAM156	P6
FAM156B	ENSG00000268350	FAM156	P6
USP51	ENSG00000247746		P7
CXorf49	ENSG00000215115	CXorf49	P8
CXorf49B	ENSG00000215113	CXorf49	P8
DMRTC1B	ENSG00000184911	DMRTC1	P9
DMRTC1	ENSG00000269502	DMRTC1	P9
FAM236B	ENSG00000268994	FAM236B	P9
FAM236A	ENSG00000275520	FAM236B	P9
FAM236D	ENSG00000225396	FAM236D	P9
FAM236C	ENSG00000283594	FAM236D	P9
PABPC1L2B	ENSG00000184388	PABPC1L2	P10
PABPC1L2A	ENSG00000186288	PABPC1L2	P10
NXF2	ENSG00000269405	NXF2	P11
NXF2B	ENSG00000269437	NXF2	P11
TCP11X1	ENSG00000268235	TCP11X	P11
TCP11X2	ENSG00000215029	TCP11X	P11
TMSB15BA	ENSG00000158427	TSMB15B	P12	Gene name in GENCODE v34: TMSB15B
TMSB15BB	ENSG00000269226	TSMB15B	P12	Gene name in GENCODE v34: TMSB15B
H2BW1	ENSG00000123569		P12
H2BW2	ENSG00000101812		P12
RHOXF2B	ENSG00000203989	RHOXF2	P13
RHOXF2	ENSG00000131721	RHOXF2	P13
RHOXF1	ENSG00000101883		P13
ETDB	ENSG00000224107	ETDB	P14
ETDA	ENSG00000238210	ETDB	P14
CT55	ENSG00000169551		P14
SPANXC	ENSG00000198573		P16
LDOC1	ENSG00000182195		P16
CXorf51B	ENSG00000235699	CXorf51	P17
CXorf51A	ENSG00000224440	CXorf51	P17
EOLA1	ENSG00000197620	EOLA	P18
EOLA2	ENSG00000197021	EOLA	P18
HSFX3	ENSG00000283697	HSFX3	P18
HSFX4	ENSG00000283463	HSFX3	P18
MAGEA8	ENSG00000156009		P18
TMEM185A	ENSG00000269556		P18/P19
MAGEA9B	ENSG00000267978	MAGEA9	P18/P19
MAGEA9	ENSG00000123584	MAGEA9	P18/P19
HSFX2	ENSG00000268738	HSFX2	P18/P19
HSFX1	ENSG00000171116	HSFX2	P18/P19
MAGEA11	ENSG00000185247		P18/P19/P20
MAGEA3	ENSG00000221867	MAGEA3	P21
MAGEA6	ENSG00000197172	MAGEA3	P21
MAGEA2	ENSG00000268606	MAGEA2	P21
MAGEA2B	ENSG00000183305	MAGEA2	P21
MAGEA12	ENSG00000213401		P21
CSAG1	ENSG00000198930		P21
CSAG2	ENSG00000268902	CSAG2	P21
CSAG3	ENSG00000268916	CSAG2	P21
PNMA6A	ENSG00000235961	PNMA6	P22	See Supplemental Note 1
PNMA6B	ENSG00000268883	PNMA6	P22	See Supplemental Note 1
Novel gene	ENSG00000224931	PWWP4	P23	Gene name in GENCODE v34: AC152010.1; See Supplemental Note 1
PWWP4	ENSG00000278803	PWWP4	P23	Gene name in GENCODE v34: AC236972.4; See Supplemental Note 1
MAGEA1	ENSG00000198681		P23
FLNA	ENSG00000196924		P24
EMD	ENSG00000102119		P24
CTAG1A	ENSG00000268651	CTAG1	P25
CTAG1B	ENSG00000184033	CTAG1	P25
IKBKG	ENSG00000269335	IKBKG	P25	See Supplemental Note 1
IKBKGP1	ENSG00000275882	IKBKG	P25	See Supplemental Note 1
H2AB2	ENSG00000277858	H2AB	P26
H2AB3	ENSG00000277745	H2AB	P26
F8A2	ENSG00000274791	F8A	P26
F8A3	ENSG00000277150	F8A	P26
