# Supplementary material for: Large palindromes on the primate X Chromosome are preserved by natural selection
Source: HighWire-hosted journal article supplement (doi:10.1101/gr.275188.120), 2021-07-21
Supplement: Supplemental_Table_S3.xlsx [file Supplemental_Table_S3.xlsx]

## Sheet: Supplemental_Table_S3.csv
Supplemental Table S3: Clones sequenced for this project. Some clones contained portions of multiple palindromes. “Finished”: Clone sequence was supported by complete Illumina coverage; “Prefinished”: Clone had at least one stretch of sequence supported by one or more nanopore reads, but no Illumina reads.
Clone	Palindrome	Status	# full length reads
CH250-106M20	P7	Prefinished	5
CH250-114J18	P9/P10	Prefinished	0
CH250-119L11	P16	Finished	0
CH250-120L20	P18/P19/P20	Prefinished	29
CH250-136N6	P3	Finished	12
CH250-137I15	P26	Prefinished	8
CH250-138B21	P12	Prefinished	2
CH250-149O24	P1	Prefinished	8
CH250-150I6	P15	Prefinished	0
CH250-163K20	P18/P19/P20	Prefinished	0
CH250-168E3	P21	Prefinished	3
CH250-174F12	P21	Prefinished	19
CH250-184A21	P18/P19/P20	Prefinished	3
CH250-191K20	P2	Finished	13
CH250-197O3	P6	Prefinished	6
CH250-214O8	P17	Finished	79
CH250-228D11	P11	Prefinished	3
CH250-234D7	P16	Finished	0
CH250-236O7	P8	Prefinished	1
CH250-240H14	P14	Finished	6
CH250-257F3	P1	Finished	4
CH250-257M3	P1	Prefinished	1
CH250-25I12	P13	Prefinished	3
CH250-273C12	P15	Prefinished	2
CH250-280C5	P16	Prefinished	6
CH250-300J22	P4/P5	Prefinished	20
CH250-312L23	P16	Finished	0
CH250-313D10	P13	Prefinished	11
CH250-318K15	P16	Finished	0
CH250-371L16	P9	Prefinished	4
CH250-396M7	P1	Prefinished	3
CH250-397P11	P15	Prefinished	23
CH250-398K19	P21	Prefinished	5
CH250-412K19	P5/P6	Prefinished	16
CH250-417G7	P26	Prefinished	2
CH250-420A18	P14	Finished	15
CH250-424H13	P25	Prefinished	23
CH250-436M9	P4/P5	Prefinished	0
CH250-440K2	P13	Prefinished	0
CH250-462M8	P21	Prefinished	4
CH250-486E21	P1	Prefinished	0
CH250-487N16	P26	Finished	2
CH250-491H11	P24	Prefinished	2
CH250-493M11	P25	Prefinished	2
CH250-498I16	P11	Prefinished	8
CH250-499B10	P1	Finished	8
CH250-503C21	P25	Prefinished	10
CH250-503N19	P25	Prefinished	2
CH250-504P11	P18/P19/P20	Prefinished	5
CH250-516N14	P12	Prefinished	0
CH250-530N5	P4/P5	Finished	5
CH250-540J3	P11	Prefinished	10
CH250-541H5	P3	Prefinished	0
CH250-547J16	P18/P19/P20	Prefinished	4
CH250-563M7	P3	Prefinished	22
CH250-57C9	P16	Finished	0
CH250-80G22	P9	Prefinished	6
CH250-87B7	P7	Prefinished	7
CH250-92B13	P12	Prefinished	1
CH250-94G2	P3	Prefinished	4
CH250-95D17	P1	Prefinished	2
CH251-130O9	P4/P5	Finished	0
CH251-160A4	P16	Prefinished	7
CH251-161L14	P7	Prefinished	2
CH251-172F20	P16	Finished	0
CH251-177B21	P2	Prefinished	21
CH251-183G21	P8	Prefinished	0
CH251-189G13	P16	Prefinished	0
CH251-239P10	P26	Prefinished	26
CH251-240O17	P5/P6	Prefinished	61
CH251-261H21	P15	Prefinished	4
CH251-277H18	P7	Prefinished	33
CH251-285D14	P26	Prefinished	1
CH251-292E19	P22/P23	Prefinished	8
CH251-316L7	P17	Prefinished	4
CH251-346A10	P25	Prefinished	12
CH251-34N14	P4/P5	Prefinished	3
CH251-385I8	P1	Prefinished	4
CH251-389B7	P14	Prefinished	20
CH251-397P16	P3	Prefinished	2
CH251-4M24	P11	Finished	21
CH251-504H5	P10	Finished	0
CH251-506D4	P6	Prefinished	0
CH251-50L15	P15	Prefinished	5
CH251-514B7	P8	Prefinished	3
CH251-542A6	P10	Prefinished	12
CH251-542D16	P12	Finished	17
CH251-542E16	P22	Prefinished	4
CH251-550E20	P12	Finished	0
CH251-565G15	P21	Prefinished	3
CH251-571K4	P15	Finished	23
CH251-58J24	P16	Finished	0
CH251-635P13	P11	Prefinished	15
CH251-639F23	P15	Prefinished	3
CH251-64D22	P16	Prefinished	4
CH251-651H9	P11	Prefinished	16
CH251-654E24	P16	Prefinished	25
CH251-657L4	P9/P10	Prefinished	17
CH251-658J15	P8	Prefinished	7
CH251-65E21	P24	Prefinished	1
CH251-671I19	P3	Prefinished	5
CH251-673E12	P16	Prefinished	2
CH251-677L24	P24/P25	Prefinished	8
CH251-702N4	P16	Finished	0
CH251-737G9	P9/P10	Prefinished	1
CH251-73C22	P2	Prefinished	0
CH251-83H5	P4	Finished	0
