# Supplementary material for: Large palindromes on the primate X Chromosome are preserved by natural selection
Source: HighWire-hosted journal article supplement (doi:10.1101/gr.275188.120), 2021-07-21
Supplement: Supplemental_Table_S4.xlsx [file Supplemental_Table_S4.xlsx]

## Sheet: Supplemental_Table_S4.csv
Supplemental Table S4: Status of palindromes identified in SHIMS 3.0 in other chimpanzee X assemblies. Missing: No palindrome present in non-SHIMS 3.0 assembly; Incomplete: Part of palindrome present in non-SHIMS 3.0 assembly; Accurate: Full palindrome present in non-SHIMS 3.0 assembly.
Palindrome	Pan_tro_3.0	Clint_PTRv2	Arm length (SHIMS 3.0)
P1	Accurate	Incomplete	28844
P2	Accurate	Accurate	25534
P3	Incomplete	Missing	36270
P4	Missing	Missing	29842
P5	Missing	Missing	105400
P6	Missing	Incomplete	34928
P7	Accurate	Missing	28530
P8	Missing	Incomplete	53154
P9	Missing	Incomplete	119578
P10	Missing	Accurate	9184
P11	Incomplete	Incomplete	160682
P14	Incomplete	Incomplete	41640
P15	Incomplete	Missing	90284
P16	Missing	Incomplete	102504
P17	Accurate	Accurate	14737
P21	Incomplete	Incomplete	37360
P22	Incomplete	Accurate	9934
P23	Missing	Incomplete	38530
P24	Missing	Accurate	11228
P25	Accurate	Missing	35368
P26	Accurate	Accurate	49024
