# Supplementary material for: Large palindromes on the primate X Chromosome are preserved by natural selection
Source: HighWire-hosted journal article supplement (doi:10.1101/gr.275188.120), 2021-07-21
Supplement: Supplemental_Table_S5.xlsx [file Supplemental_Table_S5.xlsx]

## Sheet: Supplemental_Table_S5.csv
Supplemental Table S5: Status of palindromes identified in SHIMS 3.0 in other rhesus macaque X assemblies. Missing: No palindrome present in non-SHIMS 3.0 assembly; Incomplete: Part of palindrome present in non-SHIMS 3.0 assembly; Accurate: Full palindrome present in non-SHIMS 3.0 assembly.
Palindrome	Mmul_8.0.1	Mmul_10	Arm length (SHIMS 3.0)
P1	Missing	Accurate	14749
P2	Incomplete	Accurate	42783
P3	Missing	Accurate	35266
P4	Missing	Accurate	11323
P5	Missing	Accurate	19290
P6	Missing	Accurate	15572
P7	Incomplete	Accurate	24490
P8	Incomplete	Missing	38496
P9	Incomplete	Incomplete	81971
P10	Accurate	Accurate	6574
P11	Incomplete	Missing	106186
P12	Missing	Accurate	12978
P18	Missing	Incomplete	47531
P19	Missing	Incomplete	14175
P21	Accurate	Accurate	21963
P24	Missing	Accurate	8398
P25	Missing	Missing	103488
P26	Missing	Accurate	46855
