# Supplementary material for: Large palindromes on the primate X Chromosome are preserved by natural selection
Source: HighWire-hosted journal article supplement (doi:10.1101/gr.275188.120), 2021-07-21
Supplement: Supplemental_Table_S6.xlsx [file Supplemental_Table_S6.xlsx]

## Sheet: Supplemental_Table_S6.csv
Supplemental Table S6: Conservation of X-palindrome gene families. Values shown are the number of intact gene copies found in the given species. "Region" refers to the human region in which the gene family is found.
			\
Gene family	Palindrome	Region	Human	Chimpanzee	Rhesus macaque
CENPVL	P2	Arm	2	2	2
MAGED4	P3	Arm	2	2	2
FAM156	P6	Arm	2	2	2
USP51	P7	Spacer	1	1	1
CXorf49	P8	Arm	2	2	2
DMRTC1	P9	Arm	2	2	2
FAM236B	P9	Arm	2	2	0
FAM236D	P9	Arm	2	2	0
PABPC1L2	P10	Arm	2	2	2
NXF2	P11	Arm	2	2	2
TCP11X	P11	Arm	2	2	2
MAGEA12	P21	Spacer	1	1	0
CSAG1	P21	Spacer	1	0	0
MAGEA2	P21	Arm	2	2	1
MAGEA3	P21	Arm	2	2	3
CSAG2	P21	Arm	2	3	2
FLNA	P24	Spacer	1	1	1
EMD	P24	Spacer	1	1	1
CTAG1	P25	Arm	2	2	4
IKBKG	P25	Arm	1	1	2
F8A	P26	Arm	2	2	2
H2AB	P26	Arm	2	2	2
