# Supplementary material for: Large palindromes on the primate X Chromosome are preserved by natural selection
Source: HighWire-hosted journal article supplement (doi:10.1101/gr.275188.120), 2021-07-21
Supplement: Supplemental_Table_S7.xlsx [file Supplemental_Table_S7.xlsx]

## Sheet: Supplemental_Table_S7.csv
Supplemental Table S7: Purifying selection on X-palindrome gene families. dN/dS values were calculated using the basic model in PAML (model=0,NSites=0).
2ΔL (observed vs. 1): Likelihood ratio test for observed dN/dS value versus null hypothesis (dN/dS = 1)
2ΔL (M1a vs. M2a): Likelihood ratio test for neutral evolution versus positive selection
Gene family	dN	dS	dN/dS	2ΔL (observed vs. 1)	2ΔL (M1a vs. M2a)
PABPC1L2	0	0.0472	0.0001	16.94***	0
FLNA	0.0037	0.1483	0.02472	584.08***	0
IKBKG	0.0062	0.1403	0.04421	68.52***	0.18
F8A	0.0055	0.0832	0.06665	32.38***	0
MAGED4	0.0099	0.0695	0.14308	46.38***	0
CENPVL	0.0242	0.0998	0.24204	12.5***	0
FAM156	0.0202	0.0825	0.24445	10.56**	0
USP51	0.0125	0.039	0.31986	12.16***	0.64
H2AB	0.066	0.1925	0.34267	6.70**	0
EMD	0.0369	0.096	0.38423	7.68**	4.18*
NXF2	0.0334	0.0649	0.51501	7.28**	0
MAGEA2	0.063	0.1078	0.58423	3.84	0
MAGEA3	0.1432	0.2091	0.68475	4.12*	3.18
CXorf49	0.0725	0.1036	0.69933	3.06	0.86
CTAG1	0.1309	0.1751	0.74787	1.26	2.72
TCP11X	0.0406	0.0525	0.77242	0.6	0
DMRTC1	0.0165	0.0197	0.83446	0.08	0
CSAG2	0.0958	0.0866	1.10635	0.06	8.86**
					*p<0.05
					**p<0.01
					***p<0.001
