# Supplementary material for: Large palindromes on the primate X Chromosome are preserved by natural selection
Source: HighWire-hosted journal article supplement (doi:10.1101/gr.275188.120), 2021-07-21
Supplement: Supplemental_Table_S8.xlsx [file Supplemental_Table_S8.xlsx]

## Sheet: Supplemental_Table_S8.csv
Supplemental Table S8: Rates of P17 spacer deletions in azoospermic and oligozoospermic men
Dataset	# men	# P17 deletions	% P17 deletions
1000 Genomes	944	126	13.3
dbGaP phs001023 (control)	292	54	18.5
dbGaP phs001023 (azoospermia)	286	47	16.5
Oligozoospermia	563	69	12.3
