# Supplementary material for: Large palindromes on the primate X Chromosome are preserved by natural selection
Source: HighWire-hosted journal article supplement (doi:10.1101/gr.275188.120), 2021-07-21
Supplement: Supplemental_Table_S9.xlsx [file Supplemental_Table_S9.xlsx]

## Sheet: Supplemental_Table_S9.csv
Supplemental Table S9: Chimpanzee clones used in this project that were previously sequenced and deposited in GenBank.
Clone	Palindrome
CH251-26J9	P1
CH251-17J20	P11
CH251-98I1	P12
CH251-55N11	P13
CH251-52P5	P21
CH251-498N14	P25
CH251-25B20	P26
