# Supplementary material for: Large palindromes on the primate X Chromosome are preserved by natural selection
Source: HighWire-hosted journal article supplement (doi:10.1101/gr.275188.120), 2021-07-21
Supplement: Supplemental_Table_S10.xlsx [file Supplemental_Table_S10.xlsx]

## Sheet: Supplemental_Table_S10.csv
Supplemental Table S10: PCR primers for gels shown in Supplemental Fig. 14.
Feature	Forward primer (5' to 3')	Reverse primer (5' to 3')	Notes
P1 breakpoint	CCTCCTCCGTGTTTTTCTGA	CACAAGACAGGTGCAAGGAA
P2 outer arm	CCCTCATCAAAAGGTAGGGG	CTGGGTAAGGAGATGGGGAT
P2 spacer	CGTGCGTGTGTACCATCTTT	AGCTGACTTACATGGAGGGG
P5 breakpoint	AGAAGGAGTCTCACTTTTGTCGCCCAAG	GCCTCCCAAAGTGTCTTTGTTCAGTTCA	Long range PCR
P8 breakpoint	AGACTGGGTGTTGCGAACAGACAAAAAC	GGATTTGTCTGAGAACTCATTCTTGGCG	Long-range PCR
P8 inner arm	TCCCACTGCTCTGCATCC	CTGGAAGAAGATCTTTATCCTGC
P11 breakpoint	AATCCACAGGGGACAGCTC	TGTGGGGATAGGAAGTGACA
P11 inner arm	GCAGGAGTTGCTTCTGTTACTG	TTTGAGTTTGGCTTTCCTGG
P11 spacer	TCTGTTGAATATGCTCCACACC	TAGTGCAAATTGCTTTCCAGTC
P17 breakpoint	TCAAAGTTGAAGGGTGTGGC	TTTGGCAATTCTTCCCTGTC
P17 inner arm	AAAGCAAGCTCCTAAGGATGTG	GGCATCATCCAAACAAGTGG
P17 outer arm	ATTCGAATGCTGACTCCCAC	GGGAGCTGAACTGCTGTACC
P22 breakpoint	AGTACCACACAGAGAGGGAGC	GAGGTCAGGCAAGGAAAGAG
P22 flanking	AACCATGGTCCCAAAATTCA	TCAGCAGTCAACCAGCATTC
P22 spacer	TGACCATGACTGTGGGAGAA	CAGCCCCTGCTCAAGACTAC
P25 breakpoint	TCATAGGCTGTTGATGACGG	CGTGATCCCCAAAGGTTG
P25 inner arm	CACTGTGTCCGGCAACATAC	TCTGTTCTGAGACCCTGTGC
P25 spacer	TCACACGCTGGTAATTGCAT	CAGCCCTCAGAAGAATTTGC
