# Supplementary material for: Large palindromes on the primate X Chromosome are preserved by natural selection
Source: HighWire-hosted journal article supplement (doi:10.1101/gr.275188.120), 2021-07-21
Supplement: Supplemental_Table_S11.xlsx [file Supplemental_Table_S11.xlsx]

## Sheet: Supplemental_Table_S11.csv
Supplemental Table S11: Chimpanzee and rhesus macaque clones sequenced for this project and deposited in GenBank
Clone	Accession
CH250-106M20	AC280444
CH250-114J18	AC280531
CH250-119L11	AC280481
CH250-120L20	AC280562
CH250-136N6	AC280430
CH250-137I15	AC280580
CH250-138B21	AC280536
CH250-149O24	AC280566
CH250-150I6	AC280452
CH250-163K20	AC280436
CH250-168E3	AC280520
CH250-174F12	AC280455
CH250-184A21	AC280508
CH250-191K20	AC280440
CH250-197O3	AC280457
CH250-214O8	AC280424
CH250-228D11	AC280538
CH250-234D7	AC280571
CH250-236O7	AC280541
CH250-240H14	AC280414
CH250-257F3	AC280575
CH250-257M3	AC280477
CH250-25I12	AC280437
CH250-273C12	AC280539
CH250-280C5	AC280451
CH250-300J22	AC280417
CH250-312L23	AC280517
CH250-313D10	AC280454
CH250-318K15	AC280486
CH250-371L16	AC280564
CH250-396M7	AC280543
CH250-397P11	AC280441
CH250-398K19	AC280504
CH250-412K19	AC280483
CH250-417G7	AC280442
CH250-420A18	AC280569
CH250-424H13	AC280467
CH250-436M9	AC280526
CH250-440K2	AC280563
CH250-462M8	AC280473
CH250-486E21	AC280527
CH250-487N16	AC280453
CH250-491H11	AC280464
CH250-493M11	AC280503
CH250-498I16	AC280468
CH250-499B10	AC280432
CH250-503C21	AC280489
CH250-503N19	AC280524
CH250-504P11	AC280429
CH250-516N14	AC280555
CH250-530N5	AC280476
CH250-540J3	AC280456
CH250-541H5	AC280425
CH250-547J16	AC280475
CH250-563M7	AC280492
CH250-57C9	AC280498
CH250-80G22	AC280568
CH250-87B7	AC280549
CH250-92B13	AC280534
CH250-94G2	AC280518
CH250-95D17	AC280449
CH251-130O9	AC280561
CH251-160A4	AC280458
CH251-161L14	AC280465
CH251-172F20	AC280557
CH251-177B21	AC280525
CH251-183G21	AC280578
CH251-189G13	AC280560
CH251-239P10	AC280533
CH251-240O17	AC280544
CH251-261H21	AC280545
CH251-277H18	AC280556
CH251-285D14	AC280499
CH251-292E19	AC280434
CH251-316L7	AC280500
CH251-346A10	AC280446
CH251-34N14	AC280480
CH251-385I8	AC280416
CH251-389B7	AC280426
CH251-397P16	AC280507
CH251-4M24	AC280567
CH251-504H5	AC280540
CH251-506D4	AC280415
CH251-50L15	AC280523
CH251-514B7	AC280488
CH251-542A6	AC280462
CH251-542D16	AC280579
CH251-542E16	AC280512
CH251-550E20	AC280495
CH251-565G15	AC280459
CH251-571K4	AC280521
CH251-58J24	AC280448
CH251-635P13	AC280558
CH251-639F23	AC280574
CH251-64D22	AC280469
CH251-651H9	AC280522
CH251-654E24	AC280553
CH251-657L4	AC280546
CH251-658J15	AC280445
CH251-65E21	AC280530
CH251-671I19	AC280576
CH251-673E12	AC280463
CH251-677L24	AC280565
CH251-702N4	AC280482
CH251-737G9	AC280491
CH251-73C22	AC280423
CH251-83H5	AC280548
